# Supplementary material for: Bioactive Variability and In Vitro and In Vivo Antioxidant Activity of Unprocessed and Processed Flour of Nine Cultivars of Australian lupin Species: A Comprehensive Substantiation
Source: PubMed Central journal article supplement (PMC7222189; doi:10.3390/antiox9040282), 2020-03-27
Supplement: antioxidants-09-00282-s001.pdf [file antioxidants-09-00282-s001.pdf]

## Supplementary File

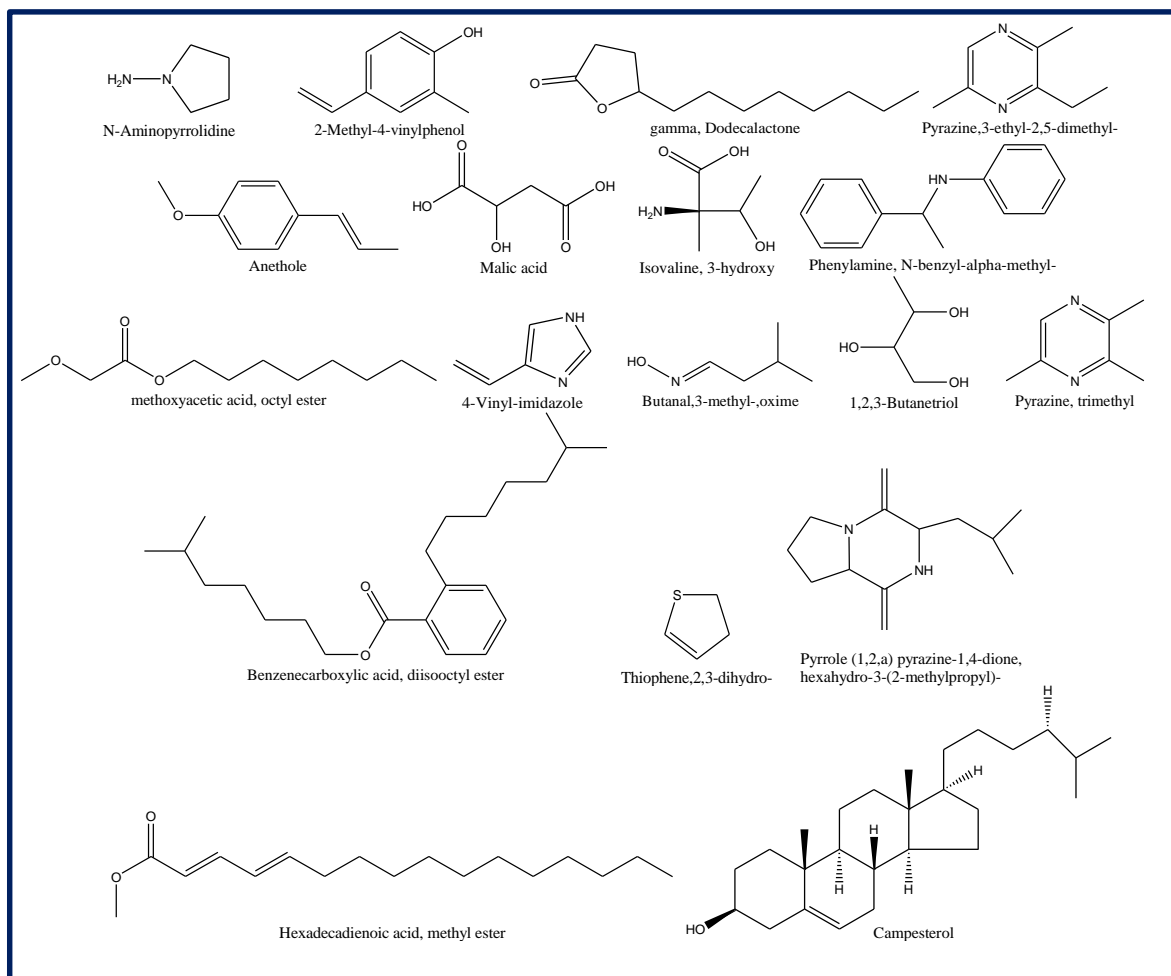

**Figure S1.** Structure of bioactive compounds present in lupin species.

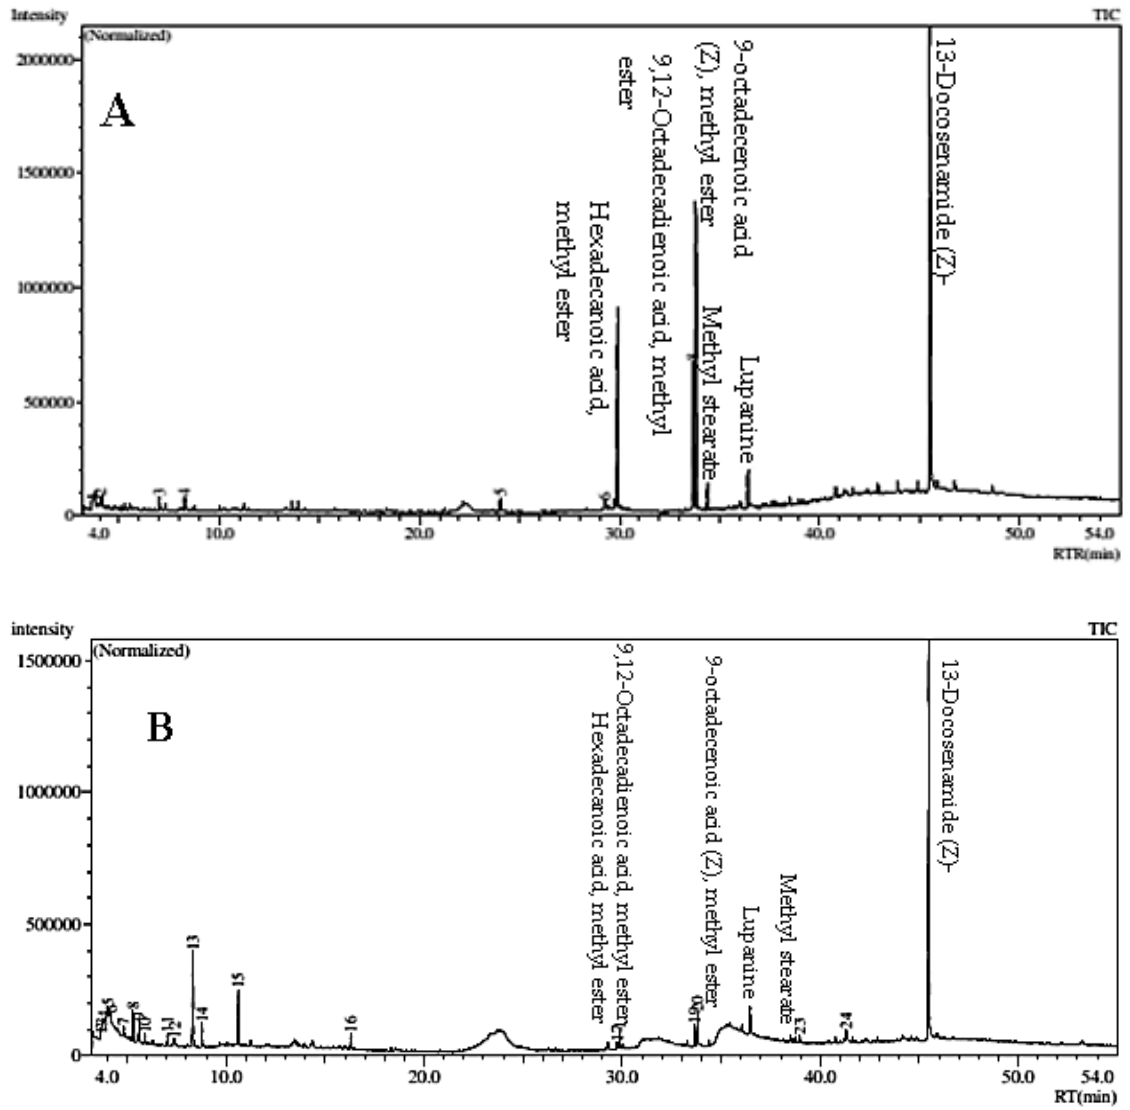

**Figure S2.** Common six compounds identified in unprocessed (A) and processed (B) flours of Lupin cultivar Jenabillup (JEN) in GC-MS analysis.

**Table S1.** Pharmacological activities of bioactive compounds present in lupin species.

| Compound class          | Bioactive compounds                                                   | Retention time (min) | m/z    | Pharmacological activity                                                              | Ref                  |
|-------------------------|-----------------------------------------------------------------------|----------------------|--------|---------------------------------------------------------------------------------------|----------------------|
| Quinolizidine alkaloid  | Lupanine                                                              | 36.44                | 136.00 | Inhibition of lipid peroxidation and free radical scavenging, antidiabetic activities | [28,29]              |
|                         | 13-OH-Lupanine                                                        | 41.29                | 152.00 | Antioxidant activity                                                                  | [31]                 |
|                         | 13a-Acetylupanine                                                     | 46.56                | 246.00 | Antifungal, antibacterial activities                                                  | [34]                 |
| Fatty acid methyl ester | Hexadecanoic acid, methyl ester                                       | 33.64                | 67.00  | Antifungal and antioxidant activities                                                 | [24]                 |
|                         | 9,12-Octadecadienoic acid, methyl ester                               | 33.64                | 67.00  | Antioxidant and antimicrobial activities                                              | [26]                 |
|                         | 11-Octadecenoic acid, methyl ester                                    | 33.82                | 55.00  | Antioxidant and antimicrobial activities                                              | [26]                 |
|                         | Methyl stearate                                                       | 34.40                | 74.00  | Antioxidant activity                                                                  | [27]                 |
|                         | 7,10-Hexadecadienoic acid, methyl ester                               | 38.68                | 67.00  | Antioxidant, anti-inflammatory, hypocholesterolemic and cancer prevention activities  | [30]                 |
|                         | 9-Octadecenoic acid, methyl ester                                     | 33.83                | 55.00  | Antioxidant activity                                                                  | [26]                 |
|                         | Methyl tetradecanoate                                                 | 24.05                | 74.00  | Antifungal and antioxidant activities                                                 | [38]                 |
|                         | Dodecanoic acid, methyl ester                                         | 16.72                | 74.00  | Antioxidant activity                                                                  | [39]                 |
|                         | 9-Hexadecenoic acid, methyl ester, (Z)-                               | 33.80                | 55.00  | Antioxidant activity                                                                  | [26]                 |
|                         | 1-Monolinoleoylglycerol Trimethylsilyl ether                          | 38.52                | 73.00  | Antioxidant, anticancer and antimicrobial activities                                  | [48]                 |
|                         | Triacotanoic acid, methyl ester                                       | 41.67                | 149.00 | Antioxidant activity                                                                  | [49]                 |
|                         | Oleic acid, 3-hydroxypropyl ester                                     | 41.77                | 55.00  | Antioxidant activity                                                                  | [51]                 |
|                         | Methyl tetradecanoate                                                 | 24.05                | 74.00  | Antioxidant activity                                                                  | [53]                 |
|                         | Methyl 9-cis,11-trans-octadecadienoate                                | 34.73                | 67.00  | Antioxidant activity                                                                  | [54]                 |
|                         | Volatile oil                                                          | Anethole             | 10.59  | 148.00                                                                                | Antioxidant activity |
| Sterol                  | Campesterol                                                           | 53.35                | 55.00  | Antioxidant activity                                                                  | [35]                 |
| Chromopeptide           | Actinomycin C2                                                        | 29.49                | 154.00 | Antimicrobial, antioxidant and anticancer activities                                  | [23]                 |
| Amine                   | N-Aminopyrrolidine                                                    | 8.42                 | 85.00  | Antioxidant activity                                                                  | [17]                 |
|                         | 13-Docosenamide, (Z)-                                                 | 45.47                | 59.00  | Antioxidant and antimicrobial activities                                              | [33]                 |
| Heterocyclic compound   | Pyrazine, 3-ethyl-2,5-dimethyl-                                       | 5.55                 | 135.00 | Antioxidant activity                                                                  | [15]                 |
|                         | Pyrazine, trimethyl                                                   | 4.186                | 122.00 | Antioxidant activity                                                                  | [15]                 |
|                         | Pyrazine, tetramethyl-                                                | 5.73                 | 54.00  | Antioxidant activity                                                                  | [15]                 |
|                         | 2-Pyrrolidione                                                        | 5.94                 | 85.00  | Antioxidant activity                                                                  | [17]                 |
|                         | Thiophene, 2,3-dihydro-                                               | 8.36                 | 85.00  | Antioxidant activity                                                                  | [17]                 |
|                         | 4-Vinyl-imidazole                                                     | 8.53                 | 94.00  | Antioxidant activity                                                                  | [18]                 |
|                         | pyrrole (1, 2, a) pyrazine 1, 4, dione, hexahydro 3-(2-methyl propyl) | 29.77                | 70.00  | Anticancer and anticholinesterase activities                                          | [22]                 |
|                         | 2,4-Dihydroxy-2,5-dimethyl-3(2H)-furan-3-o                            | 3.82                 | 101.00 | Antioxidant activity                                                                  | [43]                 |
|                         | 2-Piperidinone                                                        | 5.68                 | 85.00  | Antioxidant activity                                                                  | [44]                 |
|                         | 4H-Pyran-4-one, 2,3-dihydro-3,5-dihydroxy                             | 4.82                 | 71.00  | Antioxidant activity                                                                  | [52]                 |

|                             |                                              |       |        |                                                               |      |
|-----------------------------|----------------------------------------------|-------|--------|---------------------------------------------------------------|------|
| Lactone                     | gamma, Dodecalactone                         | 22.21 | 85.00  | Antioxidant activity                                          | [21] |
| Polyunsaturated hydrocarbon | Squalene                                     | 45.97 | 69.00  | Antioxidant activity                                          | [46] |
| Volatile compound           | 2,4-Decadienal, (E,E)-                       | 11.42 | 81.00  | Nematicidal Activity                                          | [47] |
| Indole                      | (-)-Indole-2-one, 2,3-dihydro-3-[2-[N-dimeth | 16.32 | 58.00  | Antioxidant activity                                          | [50] |
| Alcohol                     | 1,2,3-Butanetriol                            | 5.39  | 45.00  | Antioxidant activity                                          | [16] |
|                             | 2-Methyl-4-vinylphenol                       | 11.21 | 150.00 | Antioxidant activity                                          | [20] |
|                             | 2-Methoxy-4-vinylphenol                      |       |        | Antioxidant activity                                          | [45] |
| Carboxylic acid             | Malic Acid                                   | 5.289 | 89.00  | Antioxidant activity                                          | [37] |
| Others                      | 5,10-Diethoxy-2,3,7,8-tetrahydro-1H, 6H      | 30.00 | 70.00  | Antioxidant activity                                          | [25] |
|                             | 1,2-Benzenecarboxylic acid, diisooctyl ester | 41.67 | 149.00 | Antioxidant activity                                          | [32] |
|                             | Methoxyacetic acid, octyl ester              | 4.02  | 45.00  | Antioxidant activity                                          | [36] |
|                             | Divinyl sulfide                              | 3.27  | 85.00  | Antioxidant and antinociceptive activities                    | [42] |
|                             | Benzene, 1-methoxy-4-(1-propenyl)-           | 10.60 | 148.00 | Antioxidant, anti-inflammatory and gastroprotector activities | [44] |
|                             | Butanal,3-methyl-,oxime                      | 4.33  | 59.00  | Antioxidant activity                                          | [16] |
|                             | Di-n-octyl phthalate                         | 41.67 | 149.00 | Antioxidant activity                                          | [55] |

**Table S2.** Bioactive molecules obtained by GC-MS analysis in nine cultivars of processed and unprocessed lupin flours.

| Compounds name                               | Concentration (%) |   |       |      |       |      |      |      |       |      |      |       |      |      |    |      |     |   |
|----------------------------------------------|-------------------|---|-------|------|-------|------|------|------|-------|------|------|-------|------|------|----|------|-----|---|
|                                              | BAR               |   | GUN   |      | JEN   |      | JIN  |      | MAN   |      | LUX  |       | ROS  |      | WK |      | JUR |   |
|                                              | Un                | P | Un    | P    | Un    | P    | Un   | P    | Un    | P    | Un   | P     | Un   | P    | Un | P    | Un  | P |
| Pyrazine, trimethyl                          |                   |   |       | 1.01 |       | 1.12 | 0.93 |      |       | 1.13 |      | 1.07  |      |      |    |      |     |   |
| Butanal,3-methyl-,oxime                      |                   |   |       |      |       |      |      |      | 12.30 | 8.97 |      | 23.04 |      |      |    |      |     |   |
| 1-Propanol, 2-(2-hydroxypropoxy)-            |                   |   |       |      |       |      |      |      |       |      |      | 0.19  | 0.99 |      |    |      |     |   |
| 1,2,3-Butanetriol                            | 2.44              |   |       |      |       |      |      |      |       |      |      | 1.43  | 2.24 |      |    |      |     |   |
| Pyrazine, 3-ethyl-2,5-dimethyl-              |                   |   |       |      |       |      |      |      | 0.29  |      |      | 0.32  |      |      |    |      |     |   |
| Methoxyacetic acid, 2-methylpropyl ester     |                   |   |       |      |       |      |      |      | 0.92  |      |      | 1.45  |      | 1.23 |    |      |     |   |
| Pyrazine, tetramethyl-                       |                   |   |       |      |       |      |      |      |       |      | 0.92 | 1.63  |      |      |    |      |     |   |
| 2-Pyrrolidione                               |                   |   |       |      |       |      | 6.03 | 7.44 |       |      |      | 5.15  |      | 2.22 |    | 5.78 |     |   |
| Thiophene, 2,3-dihydro-                      |                   |   |       |      | 16.81 | 0.83 | 0.58 | 1.23 | 2.34  |      |      | 1.27  | 1.29 |      |    |      |     |   |
| N-Aminopyrrolidine                           |                   |   |       |      |       |      |      |      |       |      |      | 4.31  | 2.12 | 1.22 |    |      |     |   |
| 4-Vinyl-imidazole                            |                   |   |       |      |       |      |      |      |       |      |      | 0.78  | 0.82 | 0.27 |    |      |     |   |
| Anethole                                     |                   |   | 4.29  |      | 6.13  |      | 1.17 | 2.00 |       |      |      | 1.07  |      |      |    | 2.78 |     |   |
| 2-Methyl-4-vinylphenol                       |                   |   |       |      |       |      |      |      |       |      | 1.92 | 1.18  | 3.09 | 2.18 |    |      |     |   |
| N-Hydroxymethyl-2-phenylacetamide            |                   |   |       |      |       |      |      |      | 1.97  |      |      | 1.85  |      |      |    |      |     |   |
| Benzeneethanol, 4-hydroxy-                   |                   |   | 11.30 |      |       |      |      |      |       |      |      | 2.81  | 2.41 |      |    |      |     |   |
| Phenol, 2,4-bis(1,1-dimethylethyl)-          |                   |   |       |      |       |      |      |      |       | 1.22 | 0.22 | 2.18  |      |      |    |      |     |   |
| Cyclohexane, pentyl-                         |                   |   |       |      |       |      |      |      |       |      | 1.23 | 1.32  |      |      |    |      |     |   |
| 2(3H)-Furanone, dihydro-5-(2-octenyl)-, (Z)- |                   |   |       |      |       | 6.53 | 6.91 | 2.18 |       |      |      | 2.25  |      |      |    |      |     |   |
| Gamma, Dodecalactone                         |                   |   |       |      |       | 2.90 | 2.76 | 0.83 |       |      | 2.22 | 1.28  |      |      |    |      |     |   |
| 3-Methyl-1,4-diazabicyclo(4.3.0)nonan-2,5-d  |                   |   |       |      |       |      |      |      |       | 1.22 | 0.99 | 1.18  |      |      |    |      |     |   |

|                                                                             |       |      |       |       |       |       |       |       |       |      |       |       |          |      |       |       |       |       |
|-----------------------------------------------------------------------------|-------|------|-------|-------|-------|-------|-------|-------|-------|------|-------|-------|----------|------|-------|-------|-------|-------|
| Pyrrole (1, 2, a) pyrazine 1, 4,<br>dione, hexahydro 3-(2-methyl<br>propyl) |       |      |       | 0.92  | 1.00  | 0.78  | 1.06  | 1.01  | 1.93  |      |       | 0.86  |          |      |       |       |       | 0.72  |
| Actinomycin C2                                                              |       |      |       |       |       |       |       |       |       | 0.68 |       | 2.33  |          |      |       |       |       |       |
| Hexadecanoic acid, methyl ester                                             | 31.06 | 5.73 | 8.52  | 6.28  | 25.92 | 2.87  | 2.29  | 1.32  | 18.30 | 2.89 | 18.22 | 2.67  | 0.2<br>3 | 0.11 | 10.08 | 3.29  | 2.91  | 20.70 |
| 5,10-Diethoxy-2,3,7,8-tetrahydro-<br>1H, 6H                                 |       |      |       |       |       |       |       |       |       |      |       | 2.28  |          |      |       |       |       |       |
| Di(cyclopentanoyal-2)methane                                                |       |      |       |       |       |       |       |       |       | 1.55 |       | 0.5   |          |      | 1.46  |       |       |       |
| 2-Pentylcyclopentanone                                                      |       |      |       |       |       |       |       |       |       |      |       | 1.76  |          |      |       |       |       |       |
| 9,12-Octadecadienoic acid, methyl<br>ester                                  | 4.64  | 2.22 | 4.01  | 1.45  | 7.52  | 1.58  | 0.59  | 0.35  | 11.73 | 4.82 | 0.23  | 0.59  | 2.1<br>2 | 0.22 | 3.96  | 1.24  | 2.09  | 3.91  |
| 11-Octadecenoic acid, methyl ester                                          | 1.07  | 0.33 | 0.95  | 0.35  | 0.78  | 0.35  | 1.21  | 0.65  | 0.84  | 1.22 | 0.74  | 1.76  | 2.1<br>3 | 0.94 | 0.54  | 3.88  | 2.31  | 0.25  |
| Phenylamine, N-benzyl-.alpha.-<br>methyl-                                   |       |      |       |       |       |       |       |       |       |      |       | 0.38  |          |      |       |       |       |       |
| Methyl sterate                                                              | 3.95  | 4.39 | 1.12  | 1.42  | 2.93  | 4.09  | 3.39  | 4.29  | 3.97  | 0.73 | 10.47 | 1.28  | 5.2<br>2 | 2.39 | 8.91  | 0.53  | 1.44  | 2.79  |
| Lupanine                                                                    | 1.83  | 3.58 | 1.47  | 1.01  | 2.73  | 3.30  | 3.68  | 1.70  | 0.72  | 0.28 | 0.24  | 7.08  | 2.3<br>0 | 0.12 | 6.36  | 0.75  | 3.59  | 4.91  |
| 9-Octadecanamide                                                            |       |      |       |       |       |       |       |       | 21.90 |      |       | 0.77  |          |      |       |       |       |       |
| 7,14-Methano-4H,6H-dipyridol                                                |       |      |       |       |       |       |       |       |       |      |       | 0.21  | 0.1<br>1 |      |       |       |       |       |
| Ergotaman                                                                   |       |      |       |       |       |       |       |       |       |      |       | 1.05  |          |      |       |       |       |       |
| 7,10-Hexadecadienoic acid, methyl<br>ester                                  |       |      |       |       |       |       |       |       | 1.67  |      |       | 1.33  | 0.2<br>3 |      |       |       |       |       |
| 9-Octadecanamide                                                            |       |      |       | 0.54  |       |       | 0.36  |       | 1.06  |      |       | 0.45  |          |      |       |       |       |       |
| Ergotamine                                                                  |       |      |       |       |       |       |       |       |       |      |       | 0.88  |          | 0.21 |       |       |       |       |
| 13-OH-Lupanine                                                              |       |      |       | 0.64  |       |       |       |       | 1.21  | 0.81 |       |       | 0.1<br>9 |      |       |       |       |       |
| 1,2-Benzenecarboxylic acid,<br>diisooctyl ester                             |       |      |       |       |       |       |       |       |       |      |       | 0.35  |          |      |       |       |       |       |
| 13-Docosenamide, (Z)-                                                       | 20.03 | 48.4 | 16.87 | 21.73 | 31.74 | 37.42 | 13.60 | 12.84 | 23.21 | 2.98 | 13.18 | 16.43 | 1.6<br>6 | 3.22 | 18.33 | 38.25 | 18.82 | 26.44 |



|                                                |       |  |       |       |      |      |      |      |       |      |      |
|------------------------------------------------|-------|--|-------|-------|------|------|------|------|-------|------|------|
| 2(3H)-Furanone, dihydro-3-hydroxy-4,4-dimethyl | 1.90  |  |       |       |      |      |      | 0.42 |       | 0.60 |      |
| Hexane-1,3,4-triol, 3,5-dimethyl-              | 2.31  |  |       | 1.82  |      |      |      |      |       |      |      |
| 2-Amino-3-methyl-4-pentynoic acid              | 0.66  |  |       |       |      |      |      |      |       |      |      |
| N-Aminopyrrolidine                             | 3.83  |  |       |       |      |      |      |      |       |      |      |
| 1,4-Dioxane, 2,3-dimethoxy-                    | 0.73  |  |       |       |      |      |      | 0.35 |       |      |      |
| 1,3-Dioxolane, 2-methyl-                       | 3.03  |  |       | 0.01  |      |      |      |      |       |      |      |
| 2-Piperidinone                                 | 41.88 |  | 53.85 |       |      |      |      |      |       |      |      |
| 4-Methylenebicyclo[4.2.0]oct-2-ene             | 1.36  |  | 1.30  |       |      |      |      |      |       |      |      |
| Phenol, 3,5-bis(1,1-dimethylethyl)-            | 1.04  |  |       |       |      |      |      |      |       | 0.41 |      |
| L-Proline, N-valeryl-, heptadecyl ester        | 0.83  |  | 1.31  |       | 0.12 |      |      |      |       |      |      |
| Dodecanamide, N-isobutyl-                      | 1.36  |  | 1.29  |       |      |      |      |      |       |      |      |
| N-Decanoylmorpholine                           | 0.39  |  | 0.37  |       |      |      |      | 0.24 |       |      |      |
| 4-Nitrobenzoylmethyl-.beta.-phenylpropionat    | 1.24  |  | 1.60  |       |      |      |      |      |       |      |      |
| N-Isobutyl-(6Z,8E)-decadienamide               |       |  | 0.25  |       | 0.11 |      |      |      |       |      |      |
| Hexanoic acid                                  |       |  |       |       |      |      |      | 2.99 | 0.12  | 0.81 |      |
| dl-Malic disodium salt                         |       |  |       |       |      |      |      |      |       | 0.30 |      |
| Divinyl sulfide                                | 2.02  |  |       |       |      |      |      | 0.21 |       | 0.93 |      |
| Benzene, 1-methoxy-4-(1-propenyl)-             |       |  |       |       |      |      |      |      |       | 5.41 |      |
| 2-Methoxy-4-vinylphenol                        |       |  |       |       |      |      |      |      |       | 0.46 |      |
| 1,2-Butanediol, 1-(2-furyl)-3-methyl-          |       |  |       |       |      |      |      |      |       | 0.47 |      |
| Hydroxylupanine                                | 0.31  |  |       | 0.64  | 0.02 | 0.99 | 0.13 | 0.72 | 0.08  | 0.09 | 0.18 |
| Di-n-octyl phthalate                           |       |  |       |       |      |      |      |      |       | 9.35 |      |
| Squalene                                       | 1.05  |  |       | 0.12  |      |      |      |      |       | 1.17 | 0.93 |
| Glycerin                                       | 4.81  |  |       | 28.09 |      |      |      |      | 20.10 |      |      |
| 2,4-Decadienal, (E,E)-                         |       |  |       |       |      | 0.63 |      |      |       |      |      |
| Nonanoic acid, 9-oxo-, methyl ester            |       |  |       |       |      | 1.44 |      |      |       |      |      |



|                                                    |      |      |       |       |      |          |      |
|----------------------------------------------------|------|------|-------|-------|------|----------|------|
| Cyclopropaneoctanoic acid, 2-[[2-<br>[(2-ethylcy   |      |      |       | 0.24  |      |          |      |
| Eicosanoic acid, methyl ester                      | 0.52 |      | 2.09  | 0.89  |      |          |      |
| Methyl 6-cis,9-cis,11-trans-<br>octadecatrienoate  |      |      | 0.08  | 0.332 |      |          |      |
| 1-Monolinoleoylglycerol<br>trimethylsilyl ether    |      |      |       | 0.23  |      |          |      |
| Naphthalene, decahydro-1,5-<br>dimethyl-           |      |      |       | 0.68  |      |          |      |
| Triacontanoic acid, methyl ester                   |      |      |       | 0.17  |      |          |      |
| 2-Hydroxy-gamma-butyrolactone                      |      |      | 3.22  |       | 5.15 |          |      |
| 13-Hydroxy-lupanine TMS<br>derivative              | 0.22 |      | 0.03  |       | 0.60 | 0.56     |      |
| 3-Allyloxy-1,2 propanediol                         |      |      |       |       |      | 2.62     |      |
| 1,3-Butanediol, 2-methyl-                          |      |      |       |       |      | 3.38     |      |
| (-)-Indole-2-one, 2,3-dihydro-3-[2-<br>[N-dimeth   |      |      |       |       |      | 3.66     |      |
| Pyridine, 1-acetyl-1,2,3,4-<br>tetrahydro-5-(2-pip |      |      |       |       |      | 0.30     |      |
| Di(cyclopentanonyl-2)methane                       |      |      |       |       |      | 2.08     |      |
| Alpha-Isolupanine                                  | 0.74 |      | 18.31 |       |      | 15.45    |      |
| Oleic acid, 3-hydroxypropyl ester                  | 0.72 |      | 1.01  |       |      | 3.65     |      |
| cis-13,16-Docosadienoic acid                       |      |      | 0.91  |       |      | 1.89     |      |
| Methanone, dicyclopropyl-                          | 3.58 |      |       |       | 0.15 |          |      |
| 4H-Pyran-4-one, 2,3-dihydro-3,5-<br>dihydroxy      | 1.34 | 1.39 |       |       |      |          |      |
| Methyl tetradecanoate                              | 2.34 |      |       |       | 0.12 |          |      |
| 1,4-Dioxane, 2,3-dimethoxy-                        |      | 0.73 | 0.79  |       |      | 1.3<br>8 |      |
| Methyl 9-cis,11-trans-<br>octadecadienoate         |      | 0.46 | 0.60  |       |      |          |      |
| N-Decanoylmorpholine                               |      | 0.39 | 0.37  | 0.23  |      |          |      |
| Hexadecanoic acid, 2-hydroxy-1-<br>(hydroxymet     | 0.21 |      | 1.03  |       |      | 1.03     | 0.40 |

---

|                      |          |      |      |
|----------------------|----------|------|------|
| Di-n-octyl phthalate | 0.1<br>3 | 0.85 | 9.35 |
|----------------------|----------|------|------|

---

## Reference

1. Song, F.-L.; Gan, R.-Y.; Zhang, Y.; Xiao, Q.; Kuang, L.; Li, H.-B. Total phenolic contents and antioxidant capacities of selected chinese medicinal plants. *Int J Mol Sci* **2010**, *11*, 2362-2372, doi:10.3390/ijms11062362.
2. Fernando, C.D.; Soysa, P. Total phenolic, flavonoid contents, in-vitro antioxidant activities and hepatoprotective effect of aqueous leaf extract of *Atalantia ceylanica*. *BMC Complement Altern Med* **2014**, *14*, 395-395, doi:10.1186/1472-6882-14-395.
3. Almaraz, N.; Campos, M.; Ávila-Reyes, J.; Naranjo-Jiménez, N.; Corral, J.; Gonzalez, L. Antioxidant activity of polyphenolic extract of monofloral honeybee-collected pollen from mesquite ( *Prosopis juliflora*, Leguminosae). *Journal of Food Composition and Analysis - J FOOD COMPOS ANAL* **2007**, *20*, 119-124, doi:10.1016/j.jfca.2006.08.001.
4. Dontha, S. A REVIEW ON ANTIOXIDANT METHODS. *Asian Journal of Pharmaceutical and Clinical Research* **2016**, *9*, doi:10.22159/ajpcr.2016.v9s2.13092.
5. Sahoo, S.; Ghosh, G.; Das, D.; Nayak, S. Phytochemical investigation and in vitro antioxidant activity of an indigenous medicinal plant *Alpinia nigra* B.L. Burt. *Asian Pac J Trop Biomed* **2013**, *3*, 871-876, doi:10.1016/S2221-1691(13)60171-9.
6. Ohkawa, H.; Ohishi, N.; Yagi, K. Assay for lipid peroxides in animal tissues by thiobarbituric acid reaction. *Analytical biochemistry* **1979**, *95*, 351-358, doi:10.1016/0003-2697(79)90738-3.
7. Hill, S.; Lamberson, C.R.; Xu, L.; To, R.; Tsui, H.S.; Shmanai, V.V.; Bekish, A.V.; Awad, A.M.; Marbois, B.N.; Cantor, C.R., et al. Small amounts of isotope-reinforced polyunsaturated fatty acids suppress lipid autoxidation. *Free radical biology & medicine* **2012**, *53*, 893-906, doi:10.1016/j.freeradbiomed.2012.06.004.
8. Srinivasan, R.; Chandrasekar, M.J.; Nanjan, M.J.; Suresh, B. Antioxidant activity of *Caesalpinia digyna* root. *Journal of ethnopharmacology* **2007**, *113*, 284-291, doi:10.1016/j.jep.2007.06.006.
9. Shirwaikar, A.; Rajendran, K.; Kumar, C.D. In vitro antioxidant studies of *Annona squamosa* Linn. leaves. *Indian journal of experimental biology* **2004**, *42*, 803-807.
10. Jayaprakasha, G.K.; Jaganmohan Rao, L.; Sakariah, K.K. Antioxidant activities of flavidin in different in vitro model systems. *Bioorganic & medicinal chemistry* **2004**, *12*, 5141-5146, doi:10.1016/j.bmc.2004.07.028.
11. Ebrahimzadeh, M.A.; Nabavi, S.F.; Nabavi, S.M.; Eslami, B. Antihemolytic and antioxidant activities of *Allium paradoxum*. *Central European Journal of Biology* **2010**, *5*, 338-345, doi:10.2478/s11535-010-0013-5.
12. Sinha, A.K. Colorimetric assay of catalase. *Analytical biochemistry* **1972**, *47*, 389-394, doi:10.1016/0003-2697(72)90132-7.
13. McCord, J.M.; Fridovich, I. Superoxide dismutase. An enzymic function for erythrocyte hemocuprein (hemocuprein). *The Journal of biological chemistry* **1969**, *244*, 6049-6055.
14. Lowry, O.H.; Rosebrough, N.J.; Farr, A.L.; Randall, R.J. Protein measurement with the Folin phenol reagent. *The Journal of biological chemistry* **1951**, *193*, 265-275.
15. Stepanić, V.; Matijašić, M.; Horvat, T.; Verbanac, D.; Kučerová-Chlupáčová, M.; Saso, L.; Žarković, N. Antioxidant Activities of Alkyl Substituted Pyrazine Derivatives of Chalcones-In Vitro and In Silico Study. *Antioxidants (Basel, Switzerland)* **2019**, *8*, 90, doi:10.3390/antiox8040090.
16. Puntel, G.; de Carvalho, N.; Gubert, P.; Schwertner Palma, A.; Dalla Corte, C.; Avila, D.; Pereira, M.; Gervini, V.; Bresolin, L.; Rocha, J.B., et al. Butane-2,3-dionethiosemicarbazone: An oxime with antioxidant properties. *Chemico-biological interactions* **2008**, *177*, 153-160, doi:10.1016/j.cbi.2008.09.028.

17. Tavadyan, L.A.; Manukyan, Z.H.; Harutyunyan, L.H.; Musayelyan, M.V.; Sahakyan, A.D.; Tonikyan, H.G. Antioxidant Properties of Selenophene, Thiophene and Their Aminocarbonitrile Derivatives. *Antioxidants (Basel, Switzerland)* **2017**, *6*, 22, doi:10.3390/antiox6020022.
18. Sorrenti, V.; Salerno, L.; Giacomo, C.; Acquaviva, R.; Siracusa, M.; Vanella, A. Imidazole derivatives as antioxidants and selective inhibitors of nNOS. *Nitric oxide : biology and chemistry / official journal of the Nitric Oxide Society* **2006**, *14*, 45-50, doi:10.1016/j.niox.2005.09.005.
19. Freire, R.; Morais, S.; Pinheiro, D. Synthesis and antioxidant, anti-inflammatory and gastroprotector activities of anethole and related compounds. *Bioorganic & medicinal chemistry* **2005**, *13*, 4353-4358, doi:10.1016/j.bmc.2005.03.058.
20. Terpinc, P.; Polak, T.; Šegatin, N.; Hanzlowsky, A.; Ulrih, N.; Abramovi, H. Antioxidant properties of 4-vinyl derivatives of hydroxycinnamic acid. *Food Chemistry - FOOD CHEM* **2011**, *128*, 62-69, doi:10.1016/j.foodchem.2011.02.077.
21. Zeliou, K.; Papisotiropoulos, V.; Manoussopoulos, Y.; Lamari, F.N. Physical and chemical quality characteristics and antioxidant properties of strawberry cultivars (*Fragaria x ananassa* Duch.) in Greece: assessment of their sensory impact. *Journal of the science of food and agriculture* **2018**, *98*, 4065-4073, doi:10.1002/jsfa.8923.
22. Lalitha, P.; Veena, V.; Vidhyapriya, P.; Lakshmi, P.; Krishna, R.; Sakthivel, N. Anticancer potential of pyrrole (1, 2, a) pyrazine 1, 4, dione, hexahydro 3-(2-methyl propyl) (PPDHMP) extracted from a new marine bacterium, *Staphylococcus* sp. strain MB30. *Apoptosis : an international journal on programmed cell death* **2016**, *21*, 566-577, doi:10.1007/s10495-016-1221-x.
23. Saravana Kumar, P.; Al-Dhabi, N.A.; Duraipandiyan, V.; Balachandran, C.; Praveen Kumar, P.; Ignacimuthu, S. In vitro antimicrobial, antioxidant and cytotoxic properties of *Streptomyces lavendulae* strain SCA5. *BMC Microbiol* **2014**, *14*, 291-291, doi:10.1186/s12866-014-0291-6.
24. Pinto, M.; AraÚjo, S.; Morais, M.; Sá, N.; Lima, C.; Rosa, C.; Siqueira, E.; Johann, S.; Lima, L. Antifungal and antioxidant activity of fatty acid methyl esters from vegetable oils. *Anais da Academia Brasileira de Ciências* **2017**, *89*, doi:10.1590/0001-3765201720160908.
25. Khan, A.a.; Asuhaimi, F.; Jalal, T.; Roheem, F.; Natto, H.; Farid, J.; Ahmed, Q.; Wahab, R. Hystrix brachyura Bezoar Characterization, Antioxidant Activity Screening, and Anticancer Activity on Melanoma Cells (A375): A Preliminary Study. *Antioxidants* **2019**, *8*, 39, doi:10.3390/antiox8020039.
26. Rahman, M.M.; Ahmad, S.H.; Mohamed, M.T.M.; Ab Rahman, M.Z. Antimicrobial compounds from leaf extracts of *Jatropha curcas*, *Psidium guajava*, and *Andrographis paniculata*. *TheScientificWorldJournal* **2014**, *2014*, 635240-635240, doi:10.1155/2014/635240.
27. Abdel Hady, H.; El-Wakil, E.; Abdel-Gawad, M. GC-MS Analysis, Antioxidant and Cytotoxic Activities of *Mentha spicata*. *European Journal of Medicinal Plants* **2018**, *26*, 1-12, doi:10.9734/EJMP/2018/45751.
28. Kolak, U.; Gazioğlu, I.; Boga, M.; Özgökçe, F.; Ünal, M.; Choudhary, M.; Ulubelen, A. Phytochemical Investigation of *Leontice leontopetalum* L. subsp. *ewersmannii* with Antioxidant and Anticholinesterase Activities. *Records of Natural Products* **2011**, *5*, 309-313.
29. Wiedemann, M.; Gurrola-Diaz, C.M.; Vargas-Guerrero, B.; Wink, M.; Garcia-Lopez, P.M.; Dufer, M. Lupanine Improves Glucose Homeostasis by Influencing KATP Channels and Insulin Gene Expression. *Molecules (Basel, Switzerland)* **2015**, *20*, 19085-19100, doi:10.3390/molecules201019085.
30. Kalpana, D.; R, S.; Mohan, V. GC-MS analysis of ethanol extract of *Entada pursaetha* DC seed. *Bioscience Discovery* **2012**, *3*, 30-33.
31. Oleszek, M.; Kowalska, I.; Oleszek, W. Phytochemicals in bioenergy crops. *Phytochemistry Reviews* **2019**, *18*, 893-927, doi:10.1007/s11101-019-09639-7.

32. Li, M.; Zhou, L.; Yang, D.; Li, T.; Li, W. Biochemical composition and antioxidant capacity of extracts from *Podophyllum hexandrum* rhizome. *BMC Complement Altern Med* **2012**, *12*, 263-263, doi:10.1186/1472-6882-12-263.
33. Shareef, H.; Haidar, J.; Hussein, H.; Hameed, I. Antibacterial Effect of Ginger (*Zingiber officinale*) Roscoe and Bioactive Chemical Analysis using Gas Chromatography Mass Spectrum. *Oriental Journal of Chemistry* **2016**, *32*, 817-837, doi:10.13005/ojc/320207.
34. Erdemoglu, N.; Ozkan, S.; Tosun, F. Alkaloid profile and antimicrobial activity of *Lupinus angustifolius* L. alkaloid extract. *Phytochemistry Reviews* **2007**, *6*, 197-201, doi:10.1007/s11101-006-9055-8.
35. Yoshida, Y.; Niki, E. Antioxidant Effects of Phytosterol and Its Components. *Journal of nutritional science and vitaminology* **2003**, *49*, 277-280, doi:10.3177/jnsv.49.277.
36. Hailu, Y.; Atlabachew, M.; Chandravanshi, B.; Redi, M. Composition of essential oil and antioxidant activity of Khat (*Catha edulis* Forsk), Ethiopia. *Chemistry International* **2017**, *3*, 25-31.
37. Alakolanga, A.G.A.W.; Kumar, N.S.; Jayasinghe, L.; Fujimoto, Y. Antioxidant property and [Formula: see text]-glucosidase, [Formula: see text]-amylase and lipase inhibiting activities of *Flacourtia inermis* fruits: characterization of malic acid as an inhibitor of the enzymes. *J Food Sci Technol* **2015**, *52*, 8383-8388, doi:10.1007/s13197-015-1937-6.
38. Ahmad, M.; Baba, W.N.; Gani, A.; Wani, T.A.; Gani, A.; Masoodi, F.A. Effect of extraction time on antioxidants and bioactive volatile components of green tea (*Camellia sinensis*), using GC/MS. *Cogent Food & Agriculture* **2015**, *1*, doi:10.1080/23311932.2015.1106387.
39. Meechaona, R.; Sengpracha, W.; Banditpuritat, J.; Kawaree, R.; Phutdhawong, W. Fatty acid content and antioxidant activity of Thai bananas. *Maejo International Journal of Science and Technology* **2007**, *1*, 222-228.
40. Padilla-Gonzalez, G.F.; dos Santos, F.A.; Da Costa, F.B. Sesquiterpene Lactones: More Than Protective Plant Compounds With High Toxicity. *Critical Reviews in Plant Sciences* **2016**, *35*, 18-37, doi:10.1080/07352689.2016.1145956.
41. Mazurek, B.; Chmiel, M.; Górecka, B. Fatty Acids Analysis Using Gas Chromatography-Mass Spectrometer Detector (GC/MSD) - Method Validation Based on Berry Seed Extract Samples. *Food Analytical Methods* **2017**, *10*, 2868-2880, doi:10.1007/s12161-017-0834-1.
42. Rodrigues Ianiski, F.; Bassaco, M.; Vogt, A.; Reis, A.; Pinz, M.; Voss, G.; Oliveira, R.; Silveira, C.; Wilhelm, E.; Luchese, C. Antinociceptive property of vinyl sulfides in spite of their weak antioxidant activity. *Medicinal Chemistry Research* **2017**, *27*, doi:10.1007/s00044-017-2044-1.
43. Sasaki, T.; Yamakoshi, J.; Saito, M.; Kasai, K.; Matsudo, T.; Koga, T.; Mori, K. Antioxidative activities of 4-hydroxy-3(2H)-furanones and their anti-cataract effect on spontaneous cataract rat (ICR/f). *Bioscience, biotechnology, and biochemistry* **1998**, *62*, 1865-1869, doi:10.1271/bbb.62.1865.
44. Rk, M.; Begum, S.; Begum, A.; Koganti, B. Antioxidant potential of piperidine containing compounds - A short review. *Asian Journal of Pharmaceutical and Clinical Research* **2018**, *11*, 66, doi:10.22159/ajpcr.2018.v11i8.26536.
45. Fukai, S.; Tanimoto, S.; Maeda, A.; Fukuda, H.; Okada, Y.; Nomura, M. Pharmacological activity of compounds extracted from persimmon peel (*Diospyros kaki* THUNB.). *Journal of oleo science* **2009**, *58*, 213-219, doi:10.5650/jos.58.213.
46. Amarowicz, R. Squalene: A natural antioxidant? *European Journal of Lipid Science and Technology* **2009**, *111*, 411-412, doi:10.1002/ejlt.200900102.

47. Caboni, P.; Ntalli, N.; Aissani, N.; Cavoski, I.; Angioni, A. Nematicidal Activity of (E,E)-2,4-Decadienal and (E)-2-Decenal from *Ailanthus altissima* against *Meloidogyne javanica*. *Journal of agricultural and food chemistry* **2012**, *60*, 1146-1151, doi:10.1021/jf2044586.
48. Tyagi, T.; Mala, A. Phytochemical and GC-MS analysis of bioactive constituents in the ethanolic of *Pistia stratiotes* L. and *Eichhornia crassipes* (Mart.) solms. *Journal of pharmacognosy and phytochemistry* **2017**, *6*, 195-206.
49. Alqahtani, F.Y.; Aleanizy, F.S.; Mahmoud, A.Z.; Farshori, N.N.; Alfaraj, R.; Al-sheddi, E.S.; Alsarra, I.A. Chemical composition and antimicrobial, antioxidant, and anti-inflammatory activities of *Lepidium sativum* seed oil. *Saudi Journal of Biological Sciences* **2019**, *26*, 1089-1092, doi:https://doi.org/10.1016/j.sjbs.2018.05.007.
50. Said, M.; Ghareb, N.; Hanna, P.; El-Gendy, A. SYNTHESIS AND ANTIOXIDANT ACTIVITY OF NOVEL INDOLE HETEROCYCLES. **2009**.
51. Wei, C.-C.; Yen, P.-L.; Chang, S.-T.; Cheng, P.-L.; Lo, Y.-C.; Liao, V.H.-C. Antioxidative Activities of Both Oleic Acid and *Camellia tenuifolia* Seed Oil Are Regulated by the Transcription Factor DAF-16/FOXO in *Caenorhabditis elegans*. *PLoS One* **2016**, *11*, e0157195-e0157195, doi:10.1371/journal.pone.0157195.
52. Hwang, I.G.; Kim, H.Y.; Woo, K.S.; Lee, S.H.; Lee, J.; Jeong, H.S. Isolation and Identification of the Antioxidant DDMP from Heated Pear (*Pyrus pyrifolia* Nakai). *Prev Nutr Food Sci* **2013**, *18*, 76-79, doi:10.3746/pnf.2013.18.1.076.
53. Luo, Y.; Huang, Y.; Yuan, X.; Zhang, L.; Zhang, X.; Gao, P. Evaluation of Fatty Acid Composition and Antioxidant Activity of Wild-Growing Mushrooms from Southwest China. *International journal of medicinal mushrooms* **2017**, *19*, 937-947, doi:10.1615/IntJMedMushrooms.2017024388.
54. Berdeaux, O.; Voinot, L.; Angioni, E.; Juanéda, P.; Sebedio, j.-l. A simple method of preparation of methyl trans-10,cis-12- and cis-9,trans-11-octadecadienoates from methyl linoleate. *Journal of the American Oil Chemists' Society* **1998**, *75*, 1749-1755, doi:10.1007/s11746-998-0327-x.
55. Shen, C.; Wei, J.; Wang, T.; Wang, Y. Acute toxicity and responses of antioxidant systems to dibutyl phthalate in neonate and adult *Daphnia magna*. *PeerJ* **2019**, *7*, e6584-e6584, doi:10.7717/peerj.6584.
